# Supplementary material for: Auto-Continuous Synthesis of Robust and Hydrophobic Silica Aerogel Microspheres from Low-Cost Aqueous Sodium Silicate for Fast Dynamic Organics Removal
Source: Gels. 2022 Nov 28;8(12):778. doi: 10.3390/gels8120778 (PMC9777793; doi:10.3390/gels8120778)
Supplement: Supplementary file 1 [file gels-08-00778-s001.zip]

Archive with 4 entries (4 files):
- Supplementary Material-figures.pdf
- Vedio S1 The auto-continuous synthesis of the SAMs.mp4
- Vedio S2 The PSAM  destroyed in water.mp4
- Vedio S3 The RSAM retained in water.mp4
